# Supplementary material for: Methamphetamine Use in HIV-infected Individuals Affects T-cell Function and Viral Outcome during Suppressive Antiretroviral Therapy
Source: PubMed Central journal article supplement (PMC4547398; doi:10.1038/srep13179), 2015-08-24
Supplement: srep13179-s1.pdf [file srep13179-s1.pdf]

**Methamphetamine Use in HIV-infected Individuals Affects T-cell Function and  
Viral Outcome during Suppressive Antiretroviral Therapy**

Marta Massanella, Sara Gianella, Rachel Schrier, Jennifer Dan, Josué Pérez-Santiago, Michelli F. Oliveira, Douglas D Richman, Susan J Little, Constance A Benson, Eric S Daar, Michael P. Dube, Richard H Haubrich, Davey M Smith and  
Sheldon R. Morris

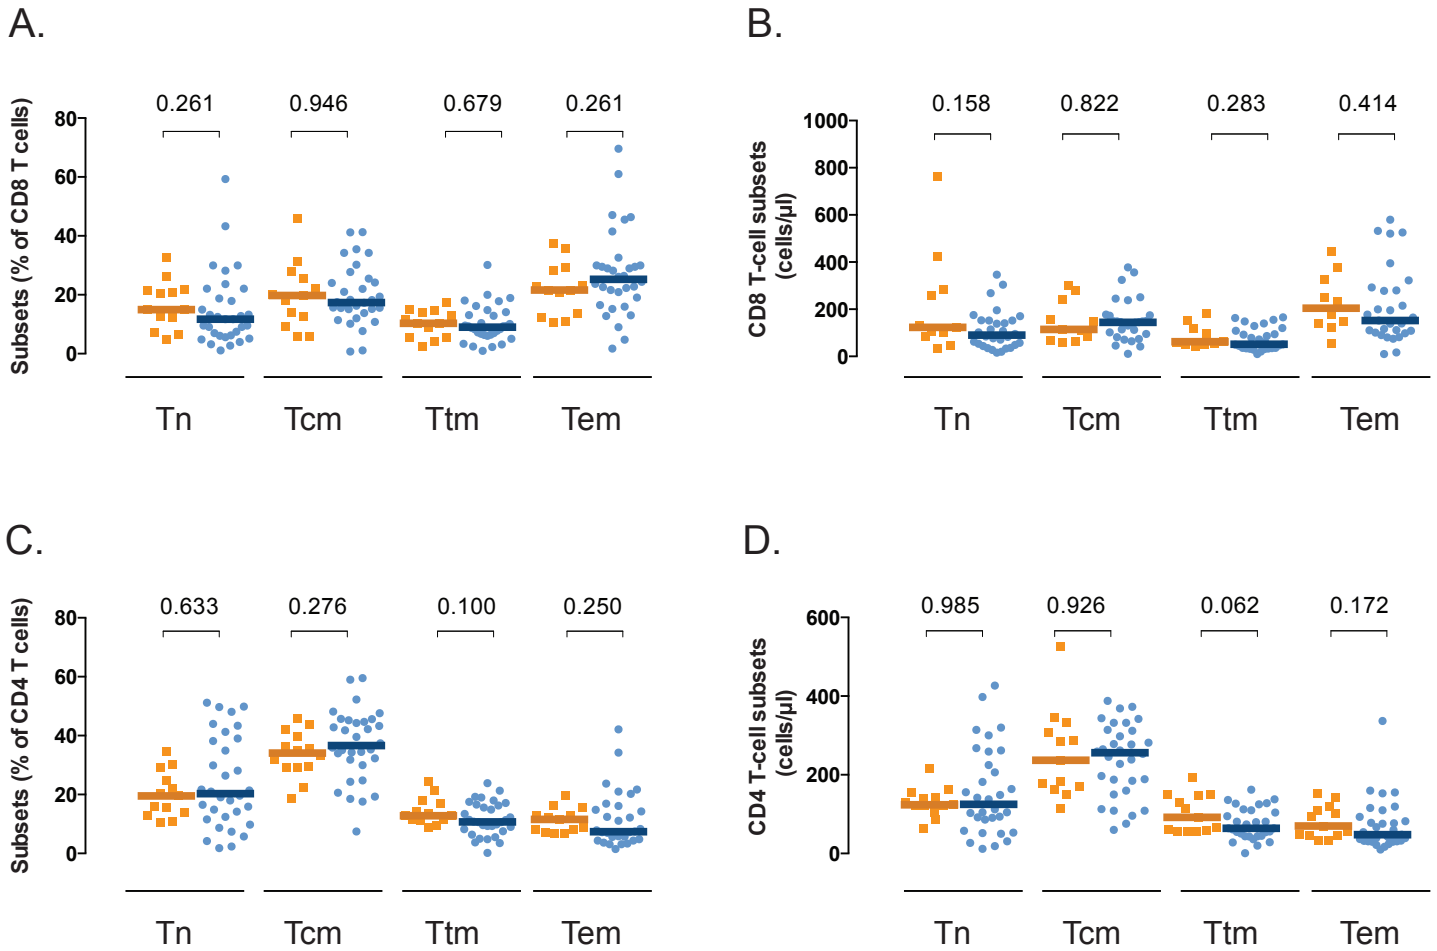

**Supplementary Figure 1:** Distribution of frequencies and absolute counts of CD8 (Panel A and B) and CD4 (Panel C and D) T-cell subsets in meth-users (orange squares) and control group (blue circles) are plotted. Individual and median values are shown. Two-sided p-values (Mann Whitney U test) are indicated.

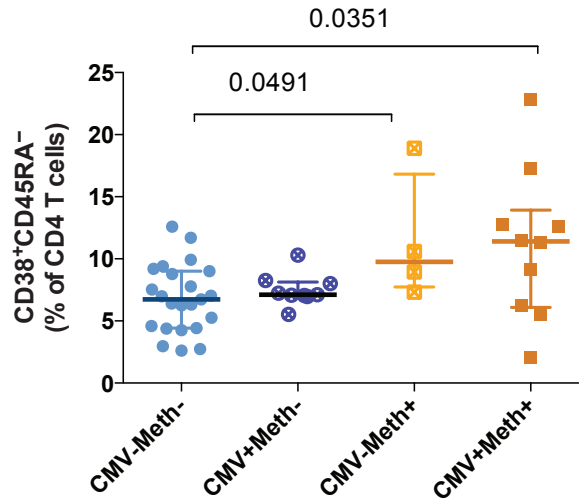

**Supplementary Figure 2:** Levels of CD4 T-cell activation (defined as CD38+CD45RA-) are shown in four groups stratified by Meth-usage and CMV shedding status. Individual and median values are shown. Two-sided p-values (Mann Whitney U test) are indicated.

**Supplementary Table 1: Comparison of immune variables between recent meth user and control groups.**

|                                                            | <b>Meth<sup>1</sup><br/>n=11</b> | <b>Control<sup>1</sup><br/>n=34</b> | <b>P-value<sup>2</sup></b> |
|------------------------------------------------------------|----------------------------------|-------------------------------------|----------------------------|
| <i>Proliferation</i>                                       |                                  |                                     |                            |
| Ki-67 <sup>+</sup> (% of CD4 T cells)                      | 4.3 [3.3-5.0]                    | 3.0 [2.4-4.2]                       | <b>0.032</b>               |
| Ki-67 <sup>+</sup> (% of Tn CD4 T cells)                   | 2.2 [1.9-5.0]                    | 1.4 [1.0-2.2]                       | <b>0.021</b>               |
| Ki-67 <sup>+</sup> (% of Tcm CD4 T cells)                  | 4.6 [3.0-5.2]                    | 3.4 [2.5-4.3]                       | 0.12                       |
| Ki-67 <sup>+</sup> (% of Ttm CD4 T cells)                  | 4.5 [3.2-4.9]                    | 3.7 [2.6-4.7]                       | 0.28                       |
| Ki-67 <sup>+</sup> (% of Tem CD4 T cells)                  | 5.0 [3.8-7.9]                    | 4.1 [2.9-5.5]                       | 0.23                       |
| Ki-67 <sup>+</sup> (% of CD8 T cells)                      | 5.9 [3.7-7.1]                    | 2.6 [2.2-3.6]                       | <b>0.0007</b>              |
| Ki-67 <sup>+</sup> (% of Tn CD8 T cells)                   | 4.4 [2.0-7.0]                    | 1.6 [1.0-2.7]                       | <b>0.0094</b>              |
| Ki-67 <sup>+</sup> (% of Tcm CD8 T cells)                  | 7.5 [3.8-9.8]                    | 3.1 [2.5-4.8]                       | <b>0.007</b>               |
| Ki-67 <sup>+</sup> (% of Ttm CD8 T cells)                  | 4.9 [3.1-8.7]                    | 2.6 [2.0-3.5]                       | <b>0.0054</b>              |
| Ki-67 <sup>+</sup> (% of Tem CD8 T cells)                  | 5.4 [3.9-6.6]                    | 2.6 [2.0-3.7]                       | <b>0.002</b>               |
| <i>Immune activation</i>                                   |                                  |                                     |                            |
| HLA-DR <sup>+</sup> CD38 <sup>+</sup> (% of CD4 T cells)   | 3.1 [2.2-5.9]                    | 2.6 [1.9-3.3]                       | 0.28                       |
| CD45RA <sup>-</sup> CD38 <sup>+</sup> (% of CD4 T cells)   | 11.0 [6.9-17.7]                  | 7.0 [5.3-8.7]                       | <b>0.02</b>                |
| HLA-DR <sup>+</sup> CD45RA <sup>-</sup> (% of CD4 T cells) | 8.5 [5.1-19/4]                   | 7.1 [6.1-10.7]                      | 0.28                       |
| HLA-DR <sup>+</sup> CD38 <sup>+</sup> (% of CD8 T cells)   | 12.8 [8.0-21.9]                  | 18.7 [10.0-24.0]                    | 0.45                       |
| CD45RA <sup>-</sup> CD38 <sup>+</sup> (% of CD8 T cells)   | 11.4 [7.5-20.0]                  | 13.2 [5.7-16.6]                     | 0.73                       |
| HLA-DR <sup>+</sup> CD45RA <sup>-</sup> (% of CD8 T cells) | 18.5 [10.6-28.6]                 | 25.4 [16.7-32.0]                    | 0.16                       |
| <i>Exhaustion</i>                                          |                                  |                                     |                            |
| PD-1 <sup>+</sup> (% of CD4 T-cells)                       | 0.6 [0.04-2.9]                   | 0.06 [0.02-0.14]                    | <b>0.02</b>                |
| PD-1 <sup>+</sup> (% of CD8 T-cells)                       | 0.9 [0.5-1.2]                    | 1.0 [0.5-1.8]                       | 0.7                        |
| <i>HIV reservoir</i>                                       |                                  |                                     |                            |
| LogPol (copies/10 <sup>6</sup> cells)                      | 2.1 [1.8-2.6]                    | 1.9 [1.1-2.2]                       | 0.18                       |

<sup>1</sup>Median [IQR] are shown. <sup>2</sup>Mann Whitney U test between meth and non-meth users
